# Supplementary material for: Toxin Profiles of Okadaic Acid Analogues and Other Lipophilic Toxins in Dinophysis from Japanese Coastal Waters
Source: Toxins (Basel). 2018 Nov 6;10(11):457. doi: 10.3390/toxins10110457 (PMC6266168; doi:10.3390/toxins10110457)
Supplement: Supplementary file 1 [file toxins-10-00457-s001.xlsx]

## Sheet: Table S1 All data
Table S1. Toxin profiles of Dinophysis species collected from around coastal locations of Japan in this study. ND: No detected. The lmit of detection (LOD: SN = 3) of OA/DTX1 in the extracts were 0.3 ng/mL, and PTX2 in the extracts was 3.0 ng/mL. Therefore, <1.2 pg /cell of OA/DTX1 and <12 pg/cell of PTX2 were the LOD when 50 cells were analyzed by in MRM analytical condition. LOD by SIM analytic…
Species	Location	Sampling Date day/month/year	cells	sample name	pg/cell
					OA	DTX1	PTX2
Dinophysis fortii	Yakumo	19/7/2006	50	Yakumo(2006)	ND(<1.2)	2.6	ND(<12)
	Yakumo	21/8/2006	50	Yakumo(2006)	ND(<1.2)	ND(<1.2)	ND(<12)
	Yakumo	21/9/2006	50	Yakumo(2006)	ND(<1.2)	ND(<1.2)	ND(<12)
	Yakumo	18/10/2006	47	Yakumo(2006)	3.3	ND(<1.3)	67.7
	Yakumo	14/11/2006	18	Yakumo(2006)	ND(<3.3)	ND(<3.3)	58.4
	Yakumo	23/7/2007	50	Yakumo(2007)	ND(<1.2)	16.3	45.2
	Yakumo	20/9/2007	27	Yakumo(2007)	ND(<2.2)	ND(<2.2)	22
	Yakumo	23/7/2009	50	Yakumo(2009)	ND(<1.2)	ND(<1.2)	ND(<12)
	Yakumo	23/7/2010	15	Yakumo(2010)	ND(<4.0)	12.8	ND(<12)
	Yakumo	24/8/2010	50	Yakumo(2010)	ND(<1.2)	25.7	36.1
	Yakumo	21/9/2010	50	Yakumo(2010)	ND(<1.2)	97.6	74
	Saroma	22/7/2008	50	Saroma(2008)	ND(<1.2)	12.6	22.8
	Saroma	19/8/2008	50	Saroma(2008)	ND(<1.2)	41.6	52
	Saroma	16/9/2008	50	Saroma(2008)	ND(<1.2)	47.2	58.8
	Saroma	20/7/2011	50	*Saroma(2011)	ND(<12)	39.72	82.8
	Saroma	22/7/2011	50	*Saroma(2011)	ND(<12)	30.52	58.4
	Saroma	7/9/2011	36	*Saroma(2011)	ND(<17)	18.8889	39.4444
	Saroma	11/10/2011	50	*Saroma(2011)	ND(<12)	26.68	86.8
	Saroma	22/8/2012	50	*Saroma(2012)	ND(<12)	22.4	39.8
	Saroma	6/9/2012	50	*Saroma(2012)	ND(<12)	34.6	52.4
	Saroma	14/10/2012	21	*Saroma(2012)	ND(<29)	ND(<29)	ND(<9.5)
	Saroma	22/7/2014	30	*Saroma(2014)	ND(<20)	ND(<20)	ND(<6.7)
	Noheji	9/4/2007	50	Noheji(2007)	ND(<1.2)	ND(<1.2)	ND(<12)
	Noheji	16/4/2007	50	Noheji(2007)	ND(<1.2)	ND(<1.2)	67.4
	Noheji	23/4/2007	50	Noheji(2007)	ND(<1.2)	ND(<1.2)	ND(<12)
	Noheji	2/5/2007	50	Noheji(2007)	ND(<1.2)	ND(<1.2)	38.3
	Noheji	7/5/2007	50	Noheji(2007)	ND(<1.2)	ND(<1.2)	39.1
	Noheji	14/5/2007	50	Noheji(2007)	ND(<1.2)	ND(<1.2)	62.3
	Noheji	22/5/2007	50	Noheji(2007)	ND(<1.2)	ND(<1.2)	ND(<12)
	Noheji	28/5/2007	50	Noheji(2007)	ND(<1.2)	2.6	18
	Noheji	4/6/2007	50	Noheji(2007)	ND(<1.2)	ND(<1.2)	ND(<12)
	Noheji	11/6/2007	50	Noheji(2007)	ND(<1.2)	ND(<1.2)	ND(<12)
	Noheji	11/6/2007	50	Noheji(2007)	ND(<1.2)	4.6	ND(<12)
	Noheji	25/6/2007	50	Noheji(2007)	ND(<1.2)	1.6	13.8
	Noheji	2/7/2007	50	Noheji(2007)	ND(<1.2)	ND(<1.2)	12.2
	Noheji	9/7/2007	50	Noheji(2007)	ND(<1.2)	2.5	47
	Noheji	17/7/2007	50	Noheji(2007)	ND(<1.2)	ND(<1.2)	83.6
	Noheji	23/7/2007	50	Noheji(2007)	8.1	ND(<1.2)	55.3
	Noheji	30/7/2007	50	Noheji(2007)	ND(<1.2)	ND(<1.2)	ND(<12)
	Noheji	6/8/2007	50	Noheji(2007)	ND(<1.2)	ND(<1.2)	ND(<12)
	Noheji	14/8/2007	50	Noheji(2007)	ND(<1.2)	ND(<1.2)	ND(<12)
	Noheji	20/8/2007	50	Noheji(2007)	ND(<1.2)	ND(<1.2)	ND(<12)
	Noheji	27/8/2007	50	Noheji(2007)	ND(<1.2)	ND(<1.2)	ND(<12)
	Aomori	25/6/2011(1)	100	*Aomori(2011)	ND(<6.0)	61	61.6
	Aomori	25/6/2011(2)	100	*Aomori(2011)	ND(<6.0)	62.2	69.4
	Aomori	25/6/2011(3)	100	*Aomori(2011)	ND(<6.0)	57	61
	Akita	10/5/2011(1)	100	*Akita(2011)	ND(<6.0)	ND(<6.0)	145.2
	Akita	10/5/2011(2)	100	*Akita(2011)	ND(<6.0)	25	124.6
	Akita	18/5/2011(1)	100	*Akita(2011)	ND(<6.0)	59.6	236
	Akita	18/5/2011(2)	100	*Akita(2011)	ND(<6.0)	54.4	236
	Akita	18/5/2011(3)	100	*Akita(2011)	ND(<6.0)	43.4	232
	Yamada	20/5/2003	50	Yamada(2003)	ND(<1.2)	13.9	36.2
	Yamada	29/5/2007	50	Yamada(2007)	ND(<1.2)	Trace (0.9)	30
	Yamada	11/6/2007	54	Yamada(2007)	Trace (0.7)	ND(<1.1)	23.2
	Yamada	19/6/2007	101	Yamada(2007)	ND(<0.6)	ND(<0.6)	7.6
	Kamaishi	2/6/2011(1)	100	*Kamaishi(2011)	ND(<6.0)	ND(<6.0)	20.4
	Kamaishi	2/6/2011(2)	100	*Kamaishi(2011)	ND(<6.0)	ND(<6.0)	10.86
	Kamaishi	2/6/2011(3)	100	*Kamaishi(2011)	ND(<6.0)	ND(<6.0)	18.36
	Sendai	3/8/2011(1)	100	*Sendai(2011)	ND(<6.0)	14.16	27
	Sendai	3/8/2011(2)	100	*Sendai(2011)	ND(<6.0)	13.7	29.8
	Sendai	3/8/2011(3)	100	*Sendai(2011)	ND(<6.0)	9.8	25
	Onagawa	3/7/2006	100	Onagawa(2006)	ND(<0.6)	17.1	105.8
	Onagawa	18/7/2006	100	Onagawa(2006)	ND(<0.6)	16.2	77.6
	Ishinomaki	31/7/2006	45	Ishinomaki(2006)	ND(<1.3)	30.3	52.4
	Ishinomaki	7/8/2006	100	Ishinomaki(2006)	ND(<0.6)	15.3	60.4
	Hakata	13/6/2006	102	Hakata(2006)	3	ND(<0.6)	21.4
Dinophysis acuminata	Yakumo	21/6/2006	60	Yakumo(2006)	ND(<1.0)	ND(<1.0)	ND(<10)
	Yakumo	24/4/2007	50	Yakumo(2007)	ND(<1.2)	1.2	23.7
	Yakumo	16/5/2007	45	Yakumo(2007)	ND(<1.3)	1.7	46.7
	Yakumo	23/7/2007	15	Yakumo(2007)	ND(<4.0)	1.1	8.9
	Yakumo	17/3/2008	9	Yakumo(2008)	ND(<6.7)	ND(<6.7)	ND(<67)
	Yakumo	22/5/2008	50	Yakumo(2008)	ND(<1.2)	1.5	5.9
	Yakumo	17/6/2008	50	Yakumo(2008)	ND(<1.2)	1.7	8.4
	Yakumo	17/3/2009	50	Yakumo(2009)	ND(<1.2)	2.3	55.6
	Yakumo	16/6/2009	50	Yakumo(2009)	ND(<1.2)	4.7	10.9
	Yakumo	23/7/2010	50	Yakumo(2010)	ND(<1.2)	2.9	20.5
	Yakumo	24/8/2010	50	Yakumo(2010)	ND(<1.2)	3.2	25.4
	Yakumo	27/7/2011	50	*Yakumo(2011)	ND(<12)	ND(<1.2)	44
	Yakumo	16/3/2012	30	*Yakumo(2012)	ND(<20)	ND(<2.0)	16.1
	Yakumo	25/6/2012	50	*Yakumo(2012)	ND(<12)	ND(<1.2)	9.7
	Yakumo	17/7/2012	50	*Yakumo(2012)	ND(<12)	ND(<1.2)	ND(<12)
	Yakumo	14/8/2012	50	*Yakumo(2012)	ND(<12)	ND(<1.2)	23.5
	Yakumo	23/6/2014	50	*Yakumo(2014)	ND(<12)	ND(<12)	ND(<12)
	Saroma	22/7/2008	50	Saroma(2008)	ND(<1.2)	2.4	12.2
	Saroma	5/12/2008	50	Saroma(2008)	Trace(0.4)	Trace(0.7)	22.8
	Saroma	29/11/2011	50	*Saroma(2011)	ND(<12)	ND(<12)	31.7
	Saroma	20/12/2011	50	*Saroma(2011)	ND(<12)	ND(<12)	36.6
	Saroma	29/1/2012	11	*Saroma(2012)	ND(<54)	ND(<54)	23.8
	Saroma	23/5/2012	50	*Saroma(2012)	ND(<12)	ND(<12)	16.6
	Saroma	4/12/2012	50	*Saroma(2012)	ND(<12)	ND(<12)	19.7
	Saroma	22/7/2014	17	*Saroma(2014)	ND(<3.5)	ND(<3.5)	ND(<35)
	Saroma	10/11/2014	45	*Saroma(2014)	ND(<13)	Trace(2.9)	63.1111
	Saroma	1/12/2014	50	*Saroma(2014)	ND(<12)	ND(<12)	54.4
	Kesennuma	25/10/2006	100	Kesennuma(2006)	ND(<0.6)	ND(<0.6)	22
	Uramura	26/4/2006	50	Uramura(2006)	ND(<1.2)	ND(<1.2)	ND(<12)
	Uramura	28/6/2006	50	Uramura(2006)	ND(<1.2)	ND(<1.2)	ND(<12)
	Uramura	12/7/2006	50	Uramura(2006)	ND(<1.2)	ND(<1.2)	ND(<12)
	Uramura	19/7/2006	100	Uramura(2006)	ND(<0.6)	ND(<0.6)	ND(<6.0)
	Uramura	26/7/2006	50	Uramura(2006)	ND(<1.2)	ND(<1.2)	ND(<12)
	Takada	2/7/2006	115	Takada(2006)	1	ND(<0.5)	ND(<5.2)
	Takada	25/7/2006	18	Takada(2006)	13.4	ND(<3.3)	ND(<33)
	Hiroshima	11/5/2006	106	Hiroshima(2006)	1.2	0.9	24.7
	Shimonoseki	5/12/2010(1)	100	*Shimonoseki(2010)	ND(<6.0)	ND(<6.0)	7.14
	Shimonoseki	5/12/2010(2)	100	*Shimonoseki(2010)	ND(<6.0)	ND(<6.0)	7.18
Dinophysis mitra	Yakumo	21/8/2006	50	D.m Yakumo(2006)	ND(<1.2)	ND(<1.2)	ND(<12)
	Yakumo	21/9/2006	30	D.m Yakumo(2006)	ND(<2.0)	ND(<2.0)	ND(<20)
	Yakumo	20/8/2007	50	D.m Yakumo(2007)	ND(<1.2)	Trace (0.1)	ND(<12)
	Yakumo	20/9/2007	50	D.m Yakumo(2007)	ND(<1.2)	Trace (0.4)	ND(<12)
	Yakumo	17/8/2008	50	D.m Yakumo(2008)	ND(<1.2)	ND(<1.2)	ND(<12)
	Yakumo	25/9/2008	50	D.m Yakumo(2008)	ND(<1.2)	Trace (1.1)	ND(<12)
	Yakumo	21/8/2009	50	D.m Yakumo(2009)	ND(<1.2)	ND(<1.2)	ND(<12)
	Yakumo	24/8/2010	50	D.m Yakumo(2010)	ND(<1.2)	ND(<1.2)	ND(<12)
	Yakumo	21/9/2010	50	D.m Yakumo(2010)	ND(<1.2)	2.6	ND(<12)
	Yakumo	29/8/2011	50	*D.m Yakumo(2011)	ND(<12)	ND(<12)	ND(<4.0)
	Yakumo	27/9/2011	50	*D.m Yakumo(2011)	ND(<12)	ND(<12)	ND(<4.0)
	Yakumo	14/8/2012	34	*D.m Yakumo(2012)	ND(<18)	ND(<18)	16.4
	Yakumo	21/8/2014	50	*D.m Yakumo(2014)	ND(<12)	ND(<12)	ND(<4.0)
	Yakumo	16/9/2014	50	*D.m Yakumo(2014)	ND(<12)	ND(<12)	ND(<4.0)
	Saroma	16/9/2008	50	D.m Saroma(2008)	Trace(0.8)	3.9	ND(<12)
	Saroma	6/9/2012	40	*D.m Saroma(2012)	ND(<15)	ND(<15)	ND(<5.0)
Dinophysis norvegica	Yakumo	16/5/2006	70	D.n Yakumo(2006)	ND(<0.9)	ND(<0.9)	ND(<8.6)
	Yakumo	21/6/2006	50	D.n Yakumo(2006)	ND(<1.2)	ND(<1.2)	55.6
	Yakumo	19/7/2006	51	D.n Yakumo(2006)	ND(<1.2)	ND(<1.2)	ND(<12)
	Yakumo	16/5/2007	100	D.n Yakumo(2007)	ND(<0.6)	Trace (0.2)	70
	Yakumo	19/6/2007	50	D.n Yakumo(2007)	ND(<1.2)	Trace (0.5)	74.4
	Yakumo	22/5/2008	50	D.n Yakumo(2008)	ND(<1.2)	ND(<1.2)	14.4
	Yakumo	17/6/2008	50	D.n Yakumo(2008)	ND(<1.2)	1.4	16.9
	Yakumo	16/6/2009	50	D.n Yakumo(2009)	ND(<1.2)	1.3	89
	Yakumo	21/6/2010	50	D.n Yakumo(2010)	2.6	ND(<1.2)	74.4
	Yakumo	14/5/2012	50	*D.n Yakumo(2012)	ND(<12)	ND(<12)	18
	Yakumo	17/7/2012	50	*D.n Yakumo(2012)	ND(<12)	ND(<12)	ND(<12)
	Yakumo	23/6/2014(1)	50	*D.n Yakumo(2014)	ND(<12)	ND(<12)	ND(<12)
	Yakumo	23/6/2014(2)	50	*D.n Yakumo(2014)	ND(<12)	ND(<12)	50.8
	Yakumo	23/6/2014(3)	50	*D.n Yakumo(2014)	ND(<12)	ND(<12)	68.8
	Yakumo	23/6/2014(4)	50	*D.n Yakumo(2014)	ND(<12)	ND(<12)	30.56
	Saroma	20/12/2011	15	*D.n Saroma(2011)	ND(<40)	ND(<40)	ND(<13)
	Saroma	29/1/2012	9	*D.n Saroma(2012)	ND(<67)	ND(<67)	ND(<22)
	Saroma	27/2/2012	28	*D.n Saroma(2012)	ND(<21)	ND(<21)	20.1
	Saroma	22/7/2014	21	*D.n Saroma(2014)	ND(<29)	ND(<29)	ND(<10)
Dinophysis infundibulus	Yakumo	23/7/2007	15	D.i Yakumo(2007)	ND(<4.0)	ND(<4.0)	ND(<40)
	Yamada	19/6/2007	28	D.i Yamada(2007)	ND(<2.1)	ND(<2.1)	ND(<21)
Dinophysis tripos	Yakumo	21/9/2006	42	D.t Yakumo(2006)	ND(<1.4)	ND(<1.4)	ND(<14)
	Yakumo	18/10/2006	50	D.t Yakumo(2006)	ND(<1.2)	ND(<1.2)	169.6
	Yakumo	14/11/2006	50	D.t Yakumo(2006)	ND(<1.2)	ND(<1.2)	138.4
	Yakumo	23/7/2007	50	D.t Yakumo(2007)	ND(<1.2)	ND(<1.2)	13.9
	Yakumo	23/7/2007	100	D.t Yakumo(2007)	ND(<0.6)	ND(<0.6)	57.8
	Yakumo	20/8/2007	50	D.t Yakumo(2007)	ND(<1.2)	ND(<1.2)	467.4
	Yakumo	20/9/2007	50	D.t Yakumo(2007)	ND(<1.2)	1.2	210.8
	Yakumo	22/10/2007	50	D.t Yakumo(2007)	ND(<1.2)	ND(<1.2)	188.4
	Yakumo	17/8/2008	17	D.t Yakumo(2008)	ND(<3.5)	ND(<3.5)	Trace(15.6)
	Yakumo	25/9/2008	50	D.t Yakumo(2008)	ND(<1.2)	ND(<1.2)	63.3
	Yakumo	20/10/2008	50	D.t Yakumo(2008)	ND(<1.2)	ND(<1.2)	39.5
	Yakumo	12/11/2008	19	D.t Yakumo(2008)	ND(<3.2)	ND(<3.2)	Trace(18.7)
	Yakumo	14/9/2009	50	D.t Yakumo(2009)	ND(<1.2)	ND(<1.2)	144.4
	Yakumo	24/11/2009	50	D.t Yakumo(2009)	ND(<1.2)	ND(<1.2)	230.4
	Yakumo	24/8/2010	37	D.t Yakumo(2010)	ND(<1.6)	ND(<1.6)	137.3
	Yakumo	21/9/2010	50	D.t Yakumo(2010)	ND(<1.2)	ND(<1.2)	137.2
	Yakumo	14/10/2010	50	D.t Yakumo(2010)	ND(<1.2)	ND(<1.2)	39.9
	Yakumo	25/11/2010	50	D.t Yakumo(2010)	ND(<1.2)	ND(<1.2)	142
	Yakumo	27/7/2011	50	*D.t Yakumo(2011)	ND(<12)	ND(<12)	78.8
	Yakumo	29/8/2011	50	*D.t Yakumo(2011)	ND(<12)	ND(<12)	416
	Yakumo	27/9/2011	50	*D.t Yakumo(2011)	ND(<12)	ND(<12)	160.4
	Yakumo	14/8/2012	50	*D.t Yakumo(2012)	ND(<12)	ND(<12)	393.2
	Yakumo	13/11/2012	50	*D.t Yakumo(2012)	ND(<12)	ND(<12)	158.4
	Yakumo	16/9/2014	50	*D.t Yakumo(2014)	ND(<12)	ND(<12)	269.2
	Yakumo	20/10/2014	50	*D.t Yakumo(2014)	ND(<12)	ND(<12)	124.8
	Yamada	19/6/2007	34	D.t Yamada(2007)	ND(<1.8)	ND(<1.8)	22.4
	Onagawa	18/7/2006	30	D.t Onagawa(2006)	ND(<2.0)	ND(<2.0)	80.7
	Onagawa	7/8/2006	100	D.t Onagawa(2006)	ND(<0.6)	ND(<0.6)	110.2
	Ishinomaki	18/7/2006	100	D.t Ishinomaki(2006)	ND(<0.6)	ND(<0.6)	181.8
Dinophysis caudata	Yakumo	21/9/2006	50	D.c Yakumo(2006)	ND(<1.2)	ND(<1.2)	ND(<12)
	Yakumo	18/10/2006	51	D.c Yakumo(2006)	ND(<1.2)	ND(<1.2)	55.3
	Yakumo	14/11/2006	50	D.c Yakumo(2006)	ND(<1.2)	ND(<1.2)	ND(<12)
	Yakumo	20/9/2007	27	D.c Yakumo(2007)	ND(<2.2)	ND(<2.2)	51.6
	Yakumo	13/11/2012	15	*D.c Yakumo(2012)	ND(<40)	ND(<40)	22.9
	Uramura	12/7/2006	50	D.c Uramura(2006)	ND(<1.2)	ND(<1.2)	ND(<12)
	Shimotsuura	30/5/2006	50	D.c Shimotsuura(2006)	ND(<1.2)	ND(<1.2)	ND(<12)
	Kagoshima	20/6/2011(1)	100	*D.c Kagoshima(2011)	ND(<6.0)	ND(<6.0)	41.8
	Kagoshima	20/6/2011(2)	100	*D.c Kagoshima(2011)	ND(<6.0)	ND(<6.0)	29.4
	Kagoshima	20/6/2011(3)	100	*D.c Kagoshima(2011)	ND(<6.0)	ND(<6.0)	36.8
Dinophysis rotundata	Yakumo	21/8/2006	50	D.ro Yakumo(2006)	ND(<1.2)	ND(<1.2)	ND(<12)
	Yakumo	21/6/2010	50	D.ro Yakumo(2010)	ND(<1.2)	ND(<1.2)	ND(<4.0)
	Yakumo	24/8/2010	50	D.ro Yakumo(2010)	ND(<1.2)	ND(<1.2)	ND(<4.0)
	Yakumo	25/6/2012	24	*D.ro Yakumo(2012)	ND(<25)	ND(<25)	ND(<8.3)
	Yakumo	14/8/2012	13	*D.ro Yakumo(2012)	ND(<46)	ND(<46)	ND(<46)
	Yakumo	22/7/2014	34	*D.ro Yakumo(2014)	ND(<18)	ND(<18)	ND(<15)
	Saroma	22/8/2011	20	*D.ro Saroma(2011)	ND(<30)	ND(<30)	ND(<10)
	Saroma	6/9/2012	50	*D.ro Saroma(2012)	ND(<12)	ND(<12)	ND(<4.0)
	Yamada	20/8/2007	100	D.ro Yamada(2007)	ND(<0.6)	0.9	ND(<6.0)
	Yamada	19/6/2007	20	D.ro Yamada(2007)	ND(<3.0)	ND(<3.0)	ND(<30)
	Ishinomaki	26/6/2006	60	D.ro Ishinomaki(2006)	ND(<1.0)	ND(<1.0)	ND(<10)
	Urakami	10/5/2006	50	D.ro Urakami(2006)	ND(<1.2)	ND(<1.2)	ND(<12)
	Urakami	17/5/2006	50	D.ro Urakami(2006)	ND(<1.2)	ND(<1.2)	ND(<12)
	Hakata	13/6/2006	111	D.ro Hakata(2006)	2.3	ND(<0.5)	ND(<5.4)
Dinophysis rudgei	Yakumo	20/8/2007	50	D.ru Yakumo(2007)	ND(<1.2)	ND(<1.2)	ND(<12)
